# Supplementary material for: Arthropod transcriptional activator protein-1 (AP-1) aids tick-rickettsial pathogen survival in the cold
Source: PubMed Central journal article supplement (PMC6065373; doi:10.1038/s41598-018-29654-6), 2018-07-30
Supplement: 41598_2018_29654_MOESM1_ESM.pdf [file 41598_2018_29654_MOESM1_ESM.pdf]

1 **Arthropod transcriptional activator protein-1 (AP-1) aids tick-rickettsial pathogen survival**  
2 **in the cold**

3

4 Supreet Khanal<sup>1</sup>, Vikas Taank<sup>1</sup>, John F. Anderson<sup>2</sup>, Hameeda Sultana<sup>1,3</sup>, and Girish  
5 Neelakanta<sup>1,3,#</sup>

6

7 **Supplementary information**

8

9 **Supplementary Figure legends**

10

11 **Supplementary Figure 1. Activator protein *ap-1* mRNA is upregulated in *A.***

12 ***phagocytophilum*-infected nymphal guts.** QRT-PCR assays showing levels of *ap-1* transcripts  
13 in uninfected (UI) and *A. phagocytophilum*-infected (I) guts isolated from unfed nymphs is  
14 shown. Each circle represents one tick sample. The levels of *ap-1* transcripts were normalized to  
15 the levels of tick beta-actin transcripts. Statistical analysis was performed using Student's t test  
16 and P value less than 0.05 was considered significant.

17

18 **Supplementary Figure 2. *A. phagocytophilum* and AP-1 influence *iafgp* promoter.** A) EMSA

19 gel image (different intensity of the image shown in Fig. 3A) showing increased shift of *iafgp*

20 TATA-binding region promoter probe in the presence of *A. phagocytophilum*. EMSAs were

21 performed with the biotin-labeled *iafgp* TATA-binding region promoter probe (DS704943,

22 18338-18387 bp) and uninfected or *A. phagocytophilum*-infected tick nuclear extracts. Wedges

23 indicate increasing amounts of nuclear extracts (1, 3, 5 µg). B) Densitometry analysis for the gel

24 image in Fig. 3A is shown. C) EMSAs (different intensity of the gel image shown in Fig. 3B)  
25 performed with the biotin-labeled *iafgp* promoter probe containing AP-1 binding site  
26 (DS704943, 18144-18193 bp) and nuclear extracts (1, 2, 3  $\mu$ g; wedges indicates increasing  
27 amounts of nuclear extract) prepared from uninfected or *A. phagocytophilum*-infected ticks.  
28 Dotted arrow indicates free probe and solid arrow indicates shift. NE indicates nuclear extracts.  
29 D) Densitometry analysis for the gel image in Fig. 3B is shown. Relative intensities of gel shifts  
30 were calculated to the control probe intensity in each gel image.

31

32 **Supplementary Figure 3. *A. phagocytophilum* does not influence *iafgp* promoter via heat**

33 **shock factor 1 (HSF-1).** A) EMSA gel image showing no shifts in the *iafgp* promoter probes

34 containing AP-1 binding site (DS704943, 18032-18081) in the presence of *A. phagocytophilum*.

35 EMSAs were performed with the biotin-labeled probes and nuclear extracts prepared from

36 uninfected or *A. phagocytophilum*-infected ticks. Wedges indicate increasing amounts of nuclear

37 extracts (1, 3, 5  $\mu$ g). Dotted arrow indicates free probe. NE indicates nuclear extracts. B) A

38 different intensity for the EMSA gel image in A is shown. C) EMSA gel image showing no shifts

39 in the *iafgp* promoter probes containing HSF-1 binding site (DS704943, 18093-18142) in the

40 presence of *A. phagocytophilum*. EMSAs were performed with the biotin-labeled probes and

41 nuclear extracts prepared from uninfected or *A. phagocytophilum*-infected ticks. Wedges

42 indicate increasing amounts of nuclear extracts (1, 3, 5  $\mu$ g). Dotted arrow indicates free probe.

43 NE indicates nuclear extracts and + or - indicates presence or absence, respectively. D) A

44 different intensity for the EMSA gel image in C is shown.

45

46 **Supplementary Figure 4. Coomassie stained gel image showing the induction of rGST-AP-1**  
47 **or rGST proteins in induced (ind) *E. coli* BL21 cell lysates.** A) Uninduced (unind) or induced  
48 (ind) rGST-AP-1 or rGST *E. coli* BL21 cell lysates is shown. Purified recombinant proteins from  
49 *E. coli* BL21 cell lysates are also shown and indicated with solid arrow (rGST-AP-1) or dotted  
50 arrow (rGST). Appearance of a band at the size similar to GST in rGST-AP-1 lane indicates  
51 possible degradation of later protein. M indicates protein marker. B) A different intensity for the  
52 SDS-PAGE gel image in A is shown.

53

54 **Supplementary Figure 5. *A. phagocytophilum* and rGST-AP-1 influence *iafgp* promoter.** A)  
55 EMSAs (different intensity of the image shown in Fig. 3C) performed with the biotin-labeled  
56 *iafgp* promoter probe containing AP-1 binding site (DS704943, 18144-18193 bp) and rGST  
57 alone or rGST-AP-1 protein (1, 1.5  $\mu$ g, wedges indicates increasing amounts of nuclear extracts).  
58 B) Densitometry analysis for the gel image in Fig. 3C is shown. C) EMSAs (different intensity of  
59 the image shown in Fig. 3D) performed with the biotin-labeled *iafgp* promoter probe containing  
60 AP-1 binding site (DS704943, 18144-18193 bp), recombinant GST or rGST-AP-1 protein (1.5  
61  $\mu$ g) and nuclear extracts (3  $\mu$ g) prepared from uninfected (UI) or *A. phagocytophilum*-infected  
62 (I) ticks. Dotted arrow indicates free probe and solid arrow indicates shift. NE indicates nuclear  
63 extracts. D) Densitometry analysis for the gel image in Fig. 3D is shown. Relative intensities of  
64 gel shifts were calculated to the control probe intensity in each gel image.

65

66 **Supplementary Figure 6. *A. phagocytophilum* and rGST-AP-1 influence *kat* gene promoter.**  
67 EMSA (different intensity of the image shown in Fig. 4A) is shown. EMSAs performed with the  
68 biotinylated AP-1 region (DS929842, 124879-124830 bp) probe from *kat* putative promoter

69 containing AP-1 binding site (DS929842, 124858-124852 bp) and rGST alone or rGST-AP-1  
70 protein (1, 3, 5  $\mu$ g; wedges indicates increasing amounts of nuclear extracts). Dotted arrow  
71 indicates free probe and solid arrow indicates band shift.

72

73 **Supplementary Figure 7. PCR amplification and sequencing of approximately 700 bp**

74 **region of *iafgp* promoter.** A) Agarose gel image showing PCR amplification of  $\sim$  700 bp DNA  
75 fragment containing *iafgp* promoter from *I. scapularis* genomic DNA. The band was excised and  
76 cloned into promoterless pGLuc vector and sequenced. Oligonucleotides used in the PCR  
77 amplification are mentioned in Supplementary Table 1. Solid arrow indicates amplification  
78 product, dotted arrow indicates primer dimer, M indicates DNA marker and NTC indicates no-  
79 template control. B) Nucleotide sequence of the  $\sim$  700 bp DNA fragment cloned in pGLuc vector  
80 is shown. The sequence is shown from 5'-3' direction. Length of the sequence is shown on one  
81 side of the sequence.

82

83 **Supplementary Figure 8. pGLuc- $P_{iafgp}$  or pGLuc transfection showed no morphological**

84 **changes in tick cells.** Representative images (1 image for each group) of uninfected or *A.*

85 *phagocytophilum*-infected pGLuc- $P_{iafgp}$  or pGLuc transfected tick cells after 48 h post

86 transfection and 24 h post infection is shown. Scale in all images indicates 200  $\mu$ m.

87

88 **Supplementary Figure 9. Amplification of luciferase transcripts in tick cells.** Agarose gel

89 image showing luciferase amplicon from uninfected (UI) and *A. phagocytophilum*-infected (I)

90 tick cells transfected with pGLuc- $P_{iafgp}$  or pGLuc is shown. Solid arrow indicates amplification

91 product, dotted arrow indicates primer dimer, M indicates DNA marker and NTC indicates no-

92 template control. B) QRT-PCR analysis showing levels of *ap-1* transcripts in mock buffer  
93 injected (mock-EB) or mock-dsRNA (generated from multiple cloning site of pL4440 vector)-  
94 injected or *ap-1*-dsRNA-injected *A. phagocytophilum*-infected nymphs. Each circle represents  
95 one tick. In panel B, the level of *ap-1* transcripts was normalized to tick-beta actin levels.  
96 Statistical analysis was performed using Student's t test and P value less than 0.05 was  
97 considered significant in panel B.

98

99 **Supplementary Figure 10. RNAi-mediated silencing of *ap-1* affects *A. phagocytophilum***  
100 **mediated regulation of *iafgp* gene expression in ticks and tick cells.** A) EMSAs (different  
101 intensity of the image shown in Fig. 6E) performed with the biotin-labeled *iafgp* promoter probe  
102 containing AP-1 binding site (DS704943, 18144-18193 bp) and nuclear extracts (2, 4, 6 µg:  
103 wedges indicates increasing concentration of nuclear extracts) prepared from *A.*  
104 *phagocytophilum*-infected mock or *ap-1*-dsRNA-treated ticks is shown. B) Densitometry  
105 analysis for the gel image in Fig. 6E is shown. C) EMSAs (different intensity of the image  
106 shown in Fig. 7E) performed with the biotin-labeled *iafgp* promoter probe containing AP-1  
107 binding site (DS704943, 18144-18193 bp) and nuclear extracts (0.5, 1 µg; wedges indicates  
108 increasing concentration of nuclear extracts) prepared from *A. phagocytophilum*-infected mock  
109 or *ap-1*-dsRNA-treated tick cells is shown. Gel shifts and the free probes are indicated with  
110 arrows. NE indicates nuclear extracts. + indicates presence and – indicates absence. D)  
111 Densitometry analysis for the gel image in Fig. 7E is shown. Relative intensities of gel shifts  
112 were calculated to the control probe intensity in each gel image.

113

114 **Supplementary Figure 11. *A. phagocytophilum* regulates *iafgp* expression in cold.**

115 A) QRT-PCR analysis showing levels of *ap-1* transcripts in uninfected nymphs incubated at  
116 room temperature or at  $4\pm 1^\circ\text{C}$  for 2 and 4 hours. The level of *ap-1* transcripts was normalized to  
117 tick-beta actin levels. Statistical analysis was performed using Student's t test and P value less  
118 than 0.05 was considered significant. B) EMSAs (different intensity of the images shown in Fig.  
119 8B) performed with the biotin-labeled *iafgp* promoter TATA probe (DS704943, 18338-18387  
120 bp) and nuclear extracts (2.5  $\mu\text{g}$ ) prepared from uninfected (UI) or *A. phagocytophilum*-infected  
121 (I) nymphal ticks incubated at  $10\pm 1^\circ\text{C}$  for 8 hrs is shown. C) Densitometry analysis for the gel  
122 image in Fig. 8B is shown. D) EMSAs (different intensity of the images shown in Fig. 8C)  
123 performed with the biotin-labeled *iafgp* promoter probe containing AP-1-binding site  
124 (DS704943, 18144-18193 bp) and nuclear extracts (2.5  $\mu\text{g}$ ) prepared from uninfected (UI) or *A.*  
125 *phagocytophilum*-infected (I) nymphal ticks incubated at  $10\pm 1^\circ\text{C}$  for 8 hrs is shown. E)  
126 Densitometry analysis for the gel image in Fig. 8C is shown. Relative intensities of gel shifts  
127 were calculated to the control probe intensity in each gel image. In panels B and D, dotted arrow  
128 indicates free probe and solid arrow indicates shift. NE indicates nuclear extracts and + indicates  
129 presence and – indicates absence.

130

131 **Supplementary Figure 12. Silencing of *ap-1* by RNAi reduces *iafgp* expression and survival**  
132 **of *A. phagocytophilum*-infected ticks at cold temperature.** QRT-PCR analysis showing  
133 reduced *ap-1* (A) or *iafgp* (B) mRNA levels in *ap-1*-dsRNA-injected *A. phagocytophilum*-  
134 infected unfed nymphal ticks compared with the mock-treated controls. C) Percentage survival  
135 of mock- or *ap-1*-dsRNA-injected *A. phagocytophilum*-infected ticks at the  $\text{LT}_{50}$  time point is  
136 shown. D) Tick mobility (in cm) by mock- or *ap-1*-dsRNA-injected *A. phagocytophilum*-  
137 infected ticks at  $\text{LT}_{50}$  time point ( $-20^\circ\text{C}$ , 25 min) is shown. In panels A, B and D each circle

138 represents one individual tick. In, panel C each circle represents one experiment performed with  
139 10 ticks/group. P value from non-paired Student's t-test is shown.

140

141

142

143

144

145

146

147

148

149

150

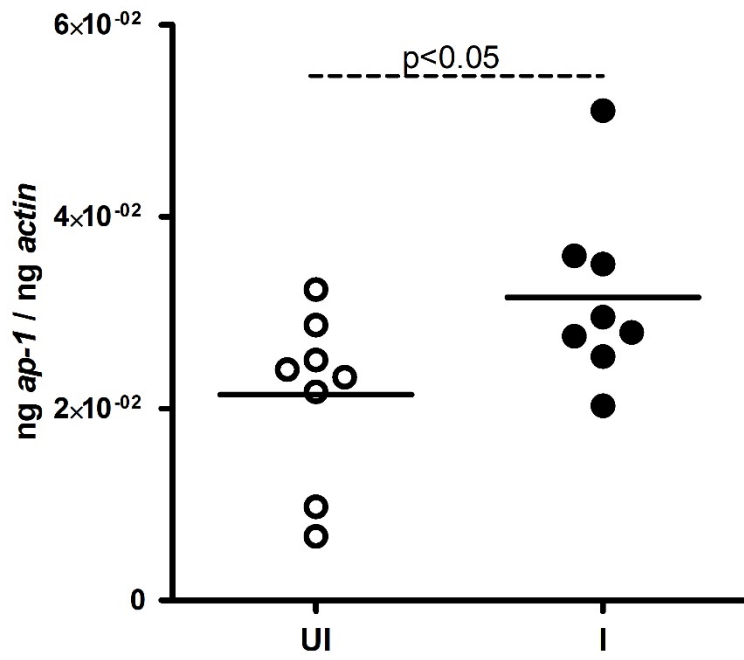

Supplementary Figure 1



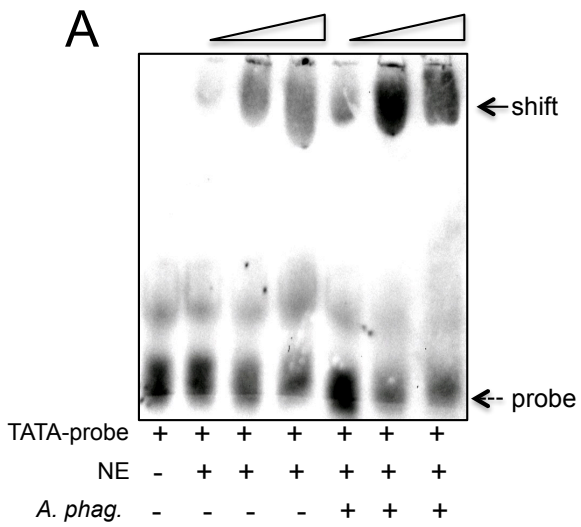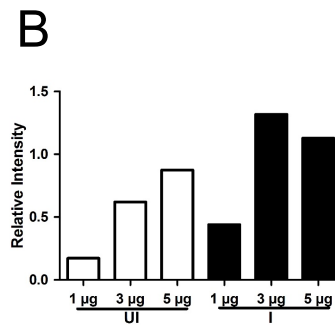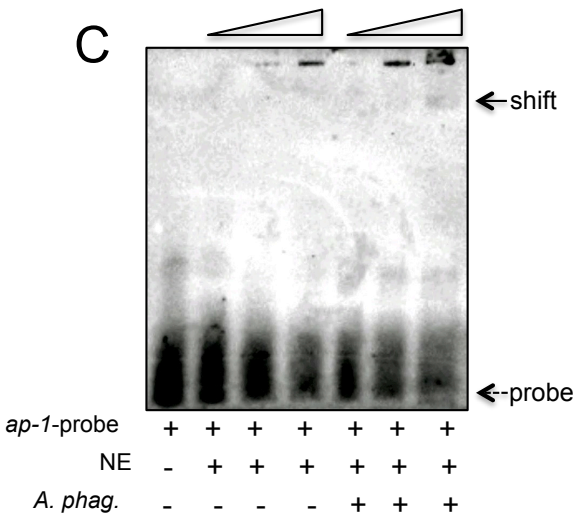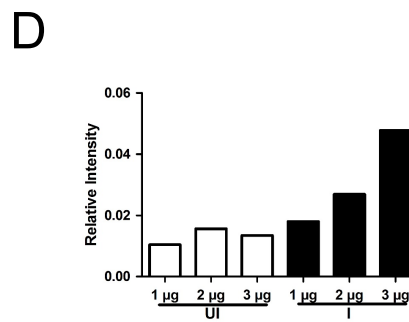

Supplementary Figure 2

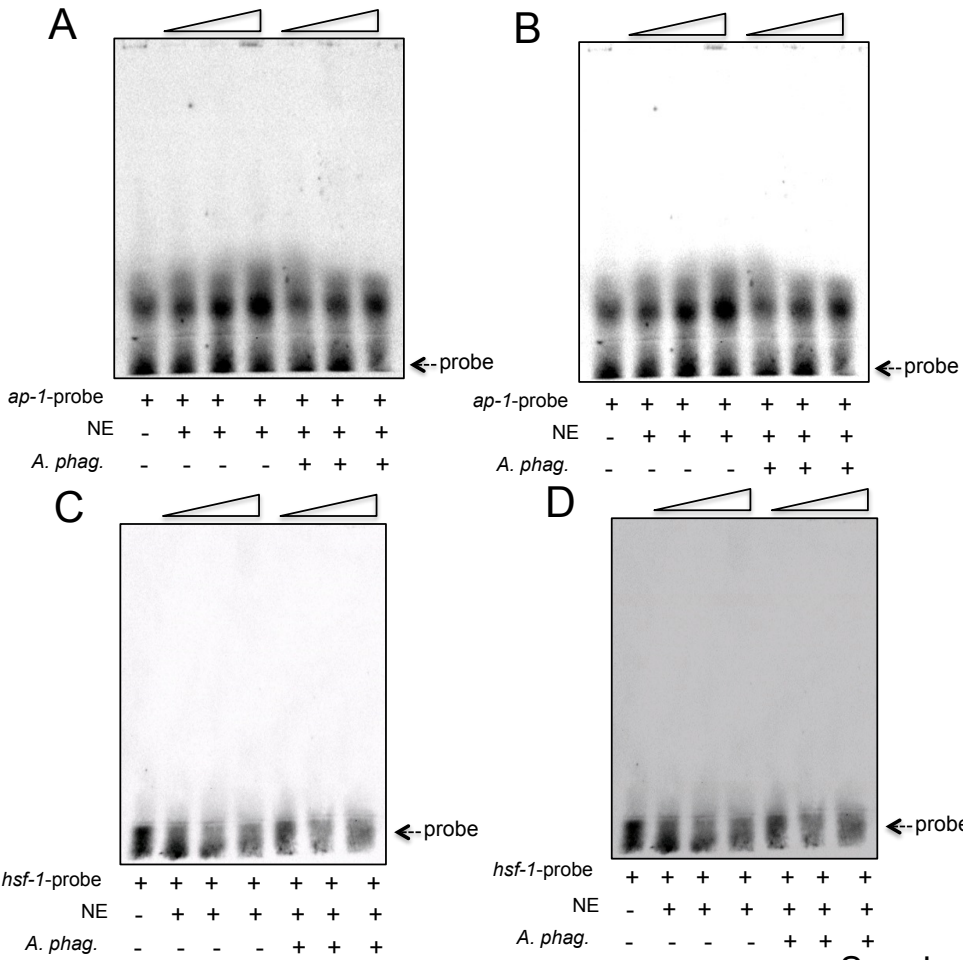

Supplementary Figure 3

153  
154  
155  
156  
157  
158  
159  
160  
161  
162

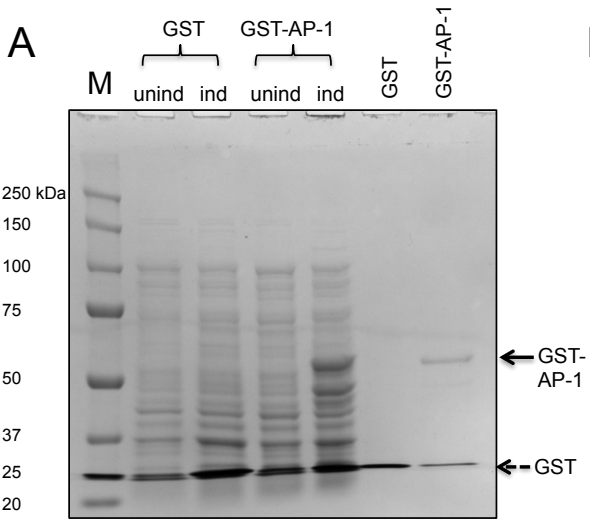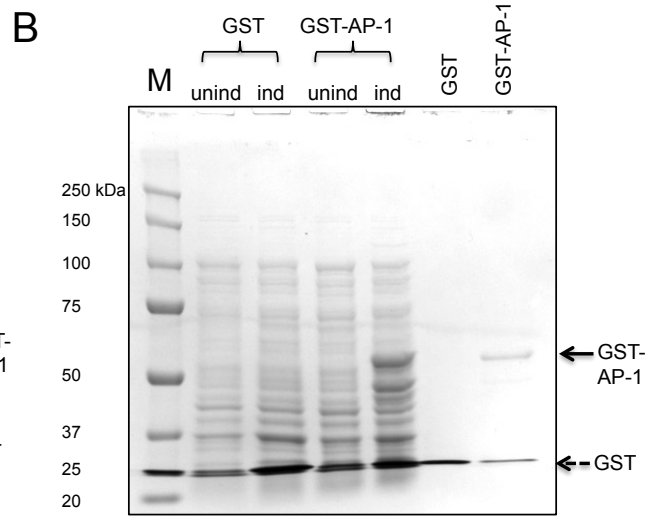

Supplementary Figure 4

163  
164  
165  
166  
167  
168  
169  
170  
171  
172  
173  
174  
175  
176  
177

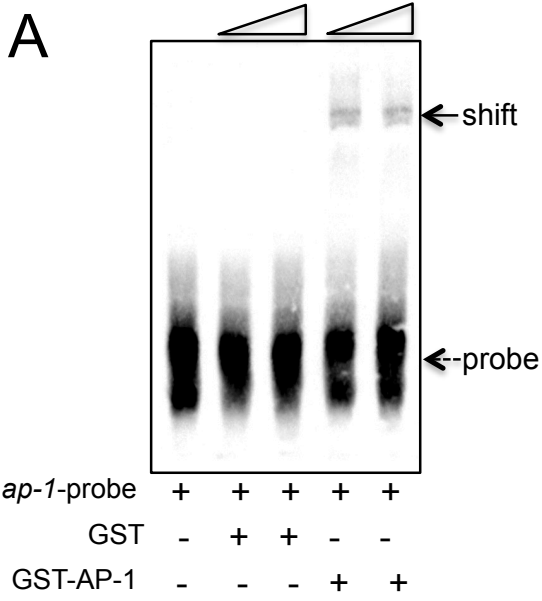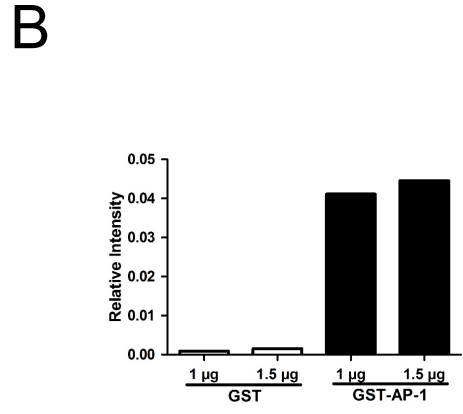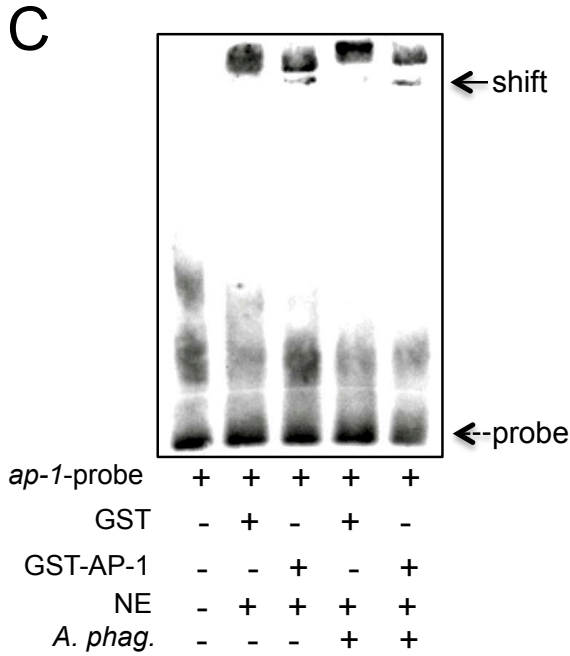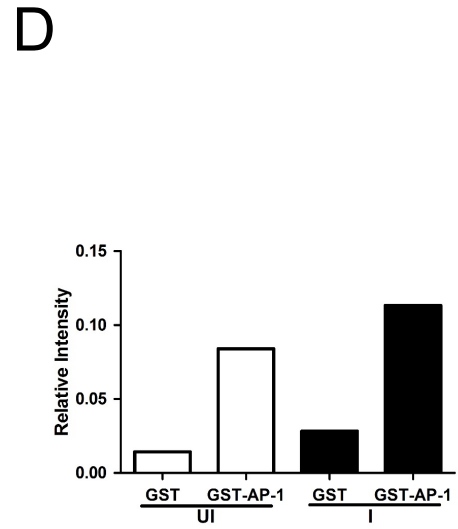

Supplementary Figure 5

178  
179  
180

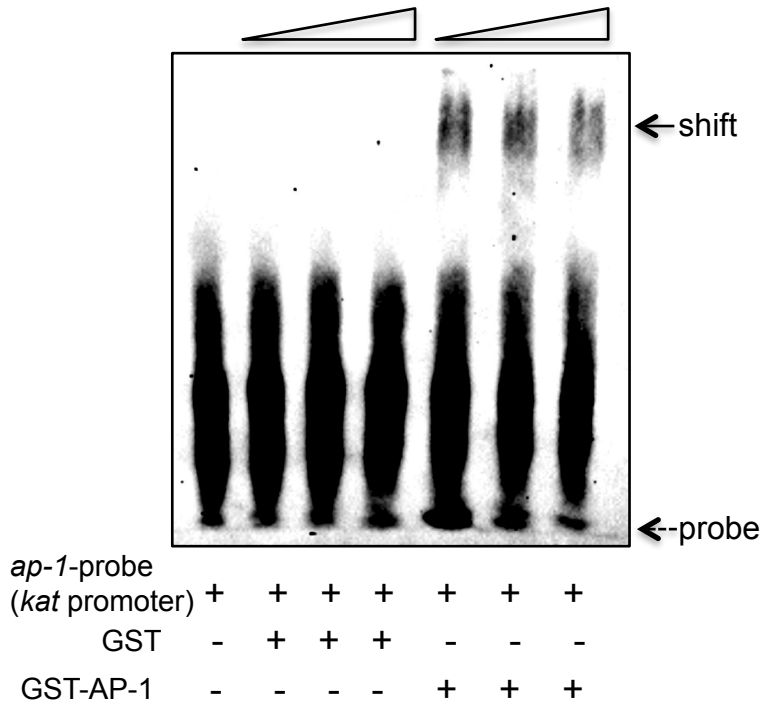

Supplementary Figure 6

181  
182  
183  
184  
185  
186  
187  
188  
189  
190  
191  
192  
193

A

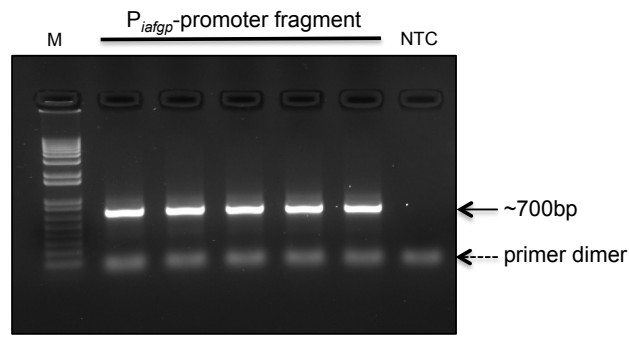

B

```

5' CGCATACTCAGGTTAGAATAAAAAACAAGCCGTTTAAGCGTGTGTACACATTACTCCTCAAAAATAACGAGATACTCGTTACTTGACCTTAAAAGTAACTAAACACGT 110
o +-----+-----+-----+-----+-----+-----+-----+-----+-----+-----+-----+-----+-----+-----+-----+
o
5' TACTTGTACATAATATATACTAACTGGGTGAAGTAAATTCGTTACTTGTACGCGTTACGTAATGTCTGGTCGAGGCAGTAGTTCCGGTCGAGGTAGTTGACTTTGAGG 220
o +-----+-----+-----+-----+-----+-----+-----+-----+-----+-----+-----+-----+-----+-----+
o
5' CACGAGCCATCGCGCAGTGGGAGGACCGATGAGTCACCGGTATCGCGTGCATAGCACGTTGGACACACATTCGAGGTGACGCTCGGGAAGGCCTGAAGGGCAGGGAGCA 330
o +-----+-----+-----+-----+-----+-----+-----+-----+-----+-----+-----+-----+-----+-----+
o
5' GCACACGTGCTGCTCCCTGCCCTACTGTGCCCTCCGAGGAAAACACCTGCATAGCGAAAACGAGTGGATGAGTGGACTGTGTCGACGACAGCCGCCGAGCCAACGCCAC 440
o +-----+-----+-----+-----+-----+-----+-----+-----+-----+-----+-----+-----+-----+-----+
o
5' GTGTCGGCATTCTACTTACAACCTACAGAAATCGGATTAATACATGCTCGCATTCAATTACAATCCGTCCTTTTTTGCATTTTTTATGTAAAATTACATTCGCGT 550
o +-----+-----+-----+-----+-----+-----+-----+-----+-----+-----+-----+-----+-----+-----+
o
5' GGCAAAATATGAAGACAACCTCGCCCTCCACCGCCAGGCTTATTTAGCTATATAAAAACAACGCAAGCTCGCCGAAAAGCACACGGGCACTACCAGACTTCAGCCAAGAGACT 660
o +-----+-----+-----+-----+-----+-----+-----+-----+-----+-----+-----+-----+-----+-----+
o
5' CCAAGAAACCAACCTACTGAAAACCATGACGACTCTGGTG
o +-----+-----+-----+-----+-----+-----+-----+-----+-----+-----+-----+-----+-----+-----+
o

```

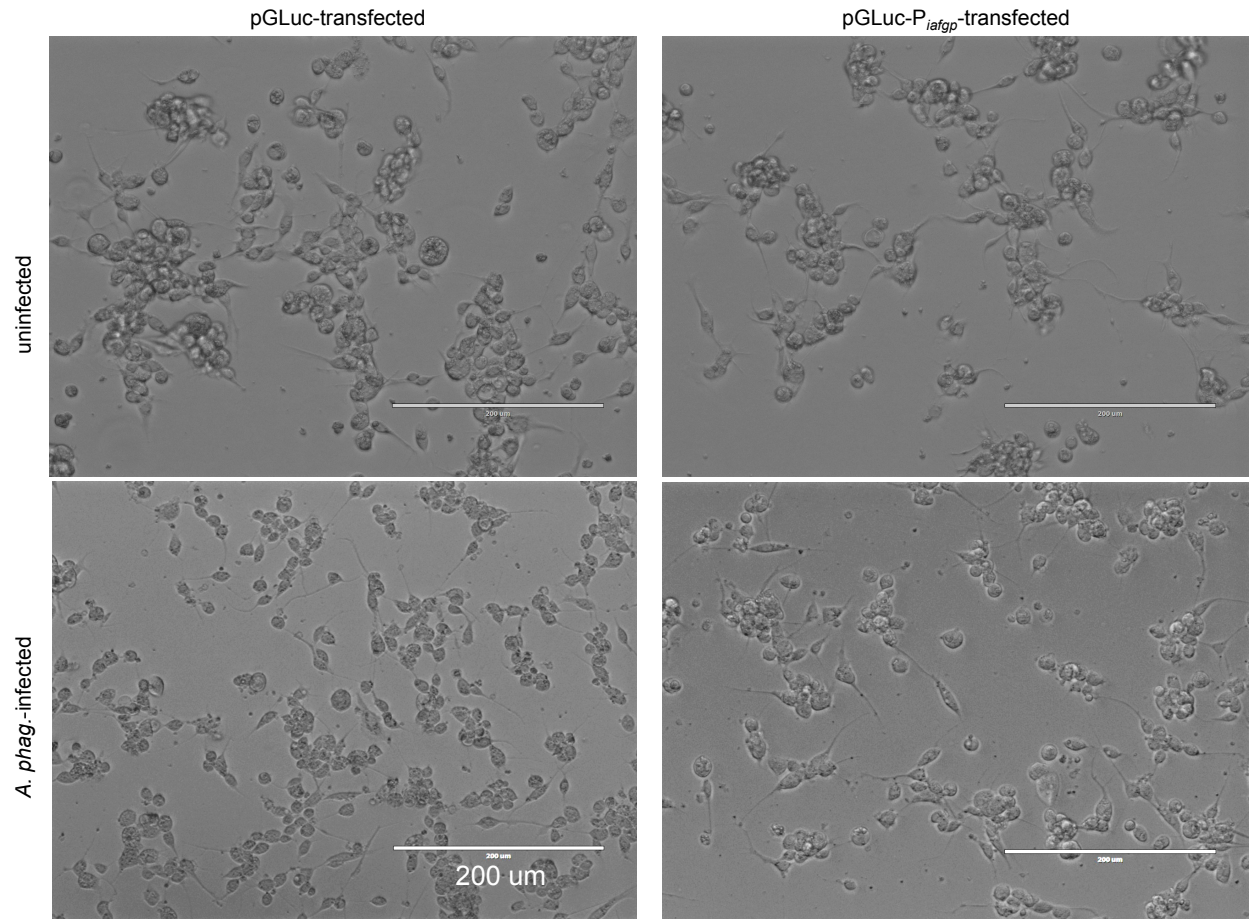

Supplementary Figure 8

195

196

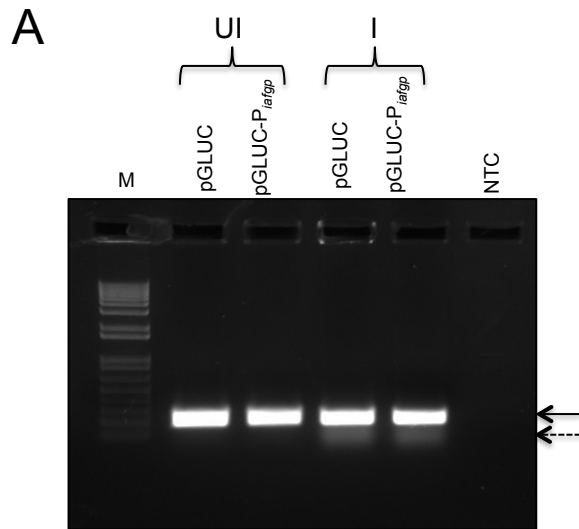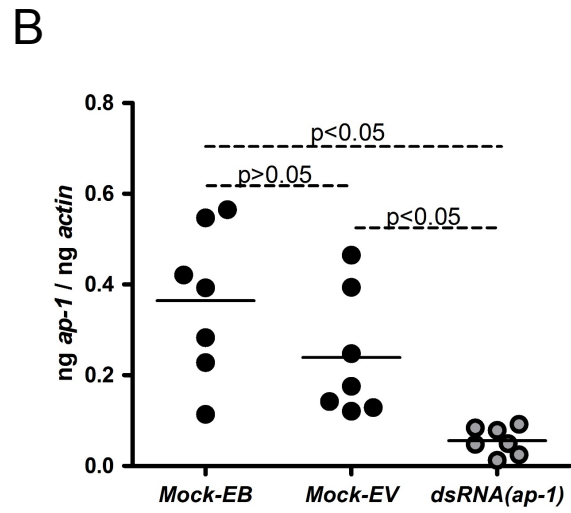

Supplementary Figure 9

197  
198  
199  
200  
201  
202  
203  
204  
205  
206  
207  
208  
209  
210  
211



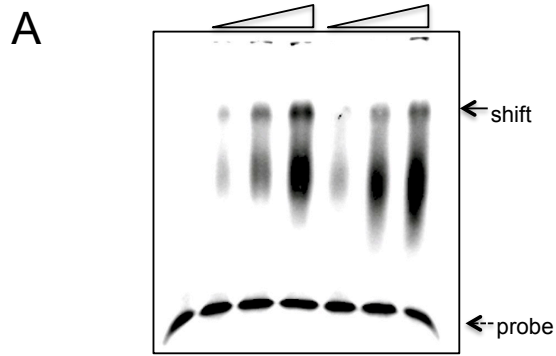

|                       |   |   |   |   |   |   |   |
|-----------------------|---|---|---|---|---|---|---|
| <i>ap-1</i> -probe    | + | + | + | + | + | + | + |
| <i>A. phag.</i>       | - | + | + | + | + | + | + |
| mock-NE               | - | + | + | + | - | - | - |
| <i>ap-1</i> -dsRNA-NE | - | - | - | - | + | + | + |

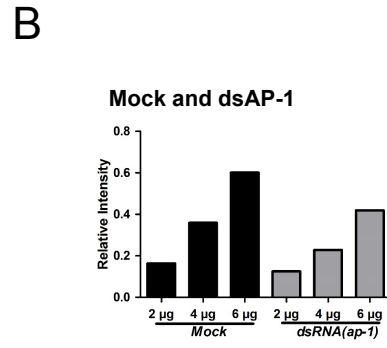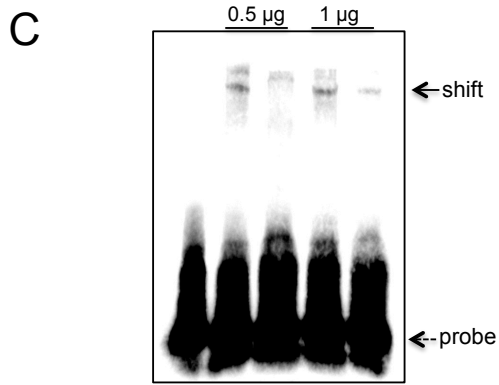

|                       |   |   |   |   |   |
|-----------------------|---|---|---|---|---|
| <i>ap-1</i> -probe    | + | + | + | + | + |
| <i>A. phag.</i>       | - | + | + | + | + |
| mock-NE               | - | + | - | + | - |
| <i>ap-1</i> -dsRNA-NE | - | - | + | - | + |

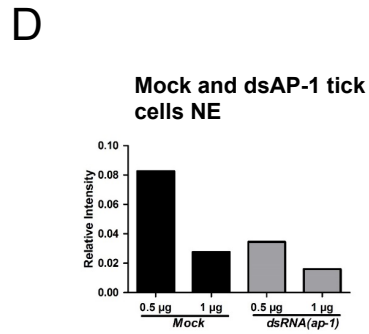

212

Supplementary Figure 10

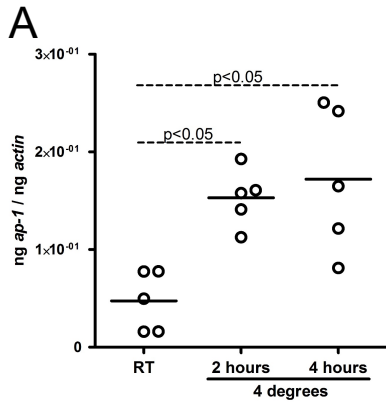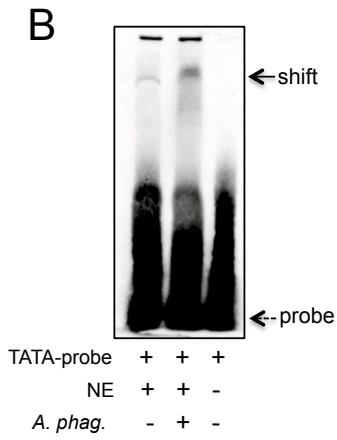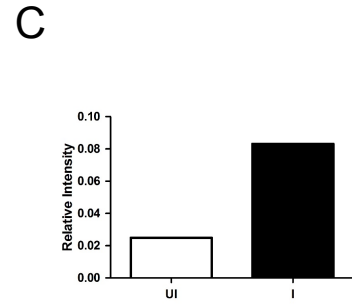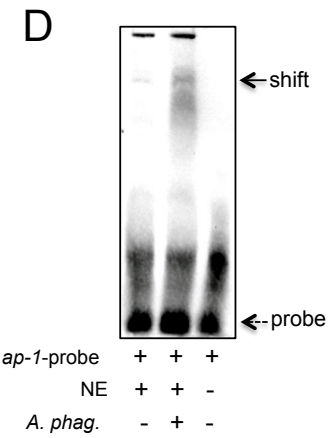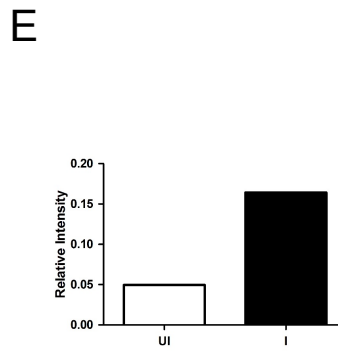

213

214

Supplementary Figure 11

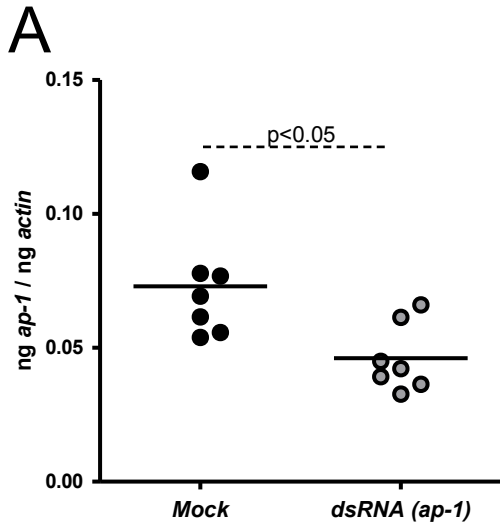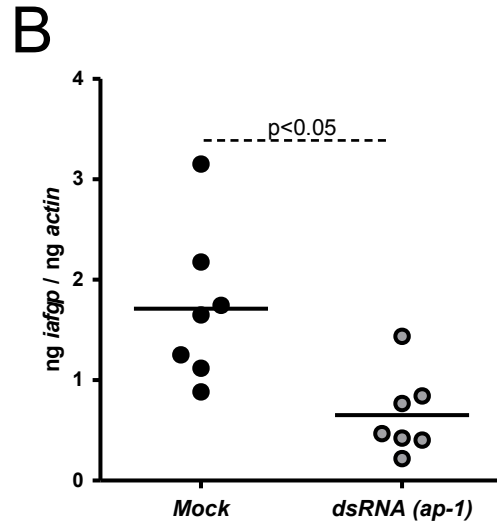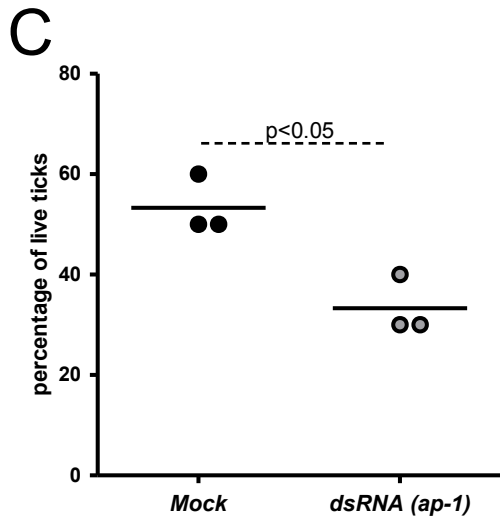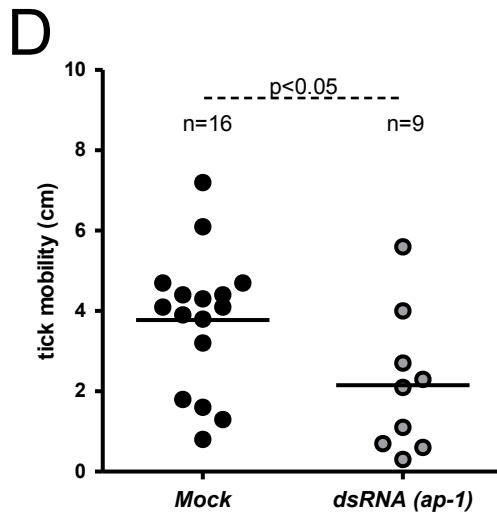

Supplementary Figure 12

215

216

217

218

219

220

221

222 **Supplementary Table 1: Oligonucleotides used in this study**

| <b>Sequence (5'-3')</b>                | <b>Purpose</b>                            |
|----------------------------------------|-------------------------------------------|
| GGTATCGTGCTCGACTC                      | tick actin, QRT-PCR                       |
| CAGGGCGACGTAGCAG                       | tick actin, QRT-PCR                       |
| GTCGACGCGTTAGCCCAACT                   | <i>ap-1</i> , QRT-PCR                     |
| CGCCGCCGCCCAAAGA                       | <i>ap-1</i> , QRT-PCR                     |
| CTGCGCCATGGAGGAGTGTA                   | <i>iafgp</i> , QRT-PCR                    |
| CGTTATTTATTCCCACGTTTTTCAT              | <i>iafgp</i> , QRT-PCR                    |
| TGGGATCCATGACCCTGGACTTGAACAGTG         | <i>ap-1</i> , pGEX-cloning                |
| CGGCGGCCGCTCACGCCGTCGTCGCA             | <i>ap-1</i> , pGEX-cloning                |
| TGAGATCTCGTCGCCCGACCTGAACA             | <i>ap-1</i> , RNAi                        |
| CGGGTACCCCGACGACGAGGGTAAGATGA          | <i>ap-1</i> , RNAi                        |
| CCAGCGTTTAGCAAGATAAGAG                 | <i>Anaplasma</i> , QRT-PCR                |
| GCCCAGTAACAACATCATAAGC                 | <i>Anaplasma</i> , QRT-PCR                |
| TCCACCGCCAGGCTTATTTTGCTATATAATACAACGCA |                                           |
| AGCTCGGCGAAA                           | <i>iafgp</i> TATA probe                   |
| TTTCGCCGAGCTTGCGTTGTATTATATAGCAAAAATAA |                                           |
| GCCTGGCGGTGGA                          | <i>iafgp</i> TATA probe                   |
| CACGTGGACACACATTCTGAGGTGACGCTCGGGAAAG  |                                           |
| CACAGAAGGGCAG                          | <i>iafgp ap-1</i> probe                   |
| CTGCCCTTCTGTGCTTTCCCGAGCGTCACCTCAGAATG |                                           |
| TGTGTCCACGTG                           | <i>iafgp ap-1</i> probe                   |
| AAAACGAGTCGATGAGTGGACTGTGTGCGCAGCACAGC |                                           |
| CGCCGAGCCTACG                          | <i>iafgp ap-1</i> probe                   |
| CGTAGGCTCGGCCGGCTGTGCTGCGACACAGTCCACTC |                                           |
| ATCGACTCGTTTT                          | <i>iafgp ap-1</i> probe                   |
| CCCAAGCTTGCACCAGAGTCGTCATGGTTTTTCAGT   | P <sub><i>iafgp</i></sub> , pGLUC cloning |
| CGGAATCCGCATACTCAGGTTAGAATAAAAAACAAG   | P <sub><i>iafgp</i></sub> , pGLUC cloning |
| CGTGCTGCTCCCTGCCCTACTGTGCCTTCCGAGGAAA  |                                           |
| ACACCTGCATAGC                          | <i>iafgp</i> , HSF-1 probe                |
| GCTATGCAGGTGTTTTCTCGGAAGGCACAGTAGGGC   |                                           |
| AGGGAGCAGCACG                          | <i>iafgp</i> , HSF-1 probe                |
| GGGTTCCGCGCACATTTC                     | pGLUC sequencing                          |
| GATGCAGATCAGGGCAAACAGA                 | pGLUC sequencing                          |
| CCCAGGACGCTGCCACA                      | luciferase, QRT-PCR                       |
| CAGCCACTTCTTGAGCAGGTCA                 | luciferase, QRT-PCR                       |
| CGCAAGCATGATTGGACCAAGTGAATCAGGCGTAAG   |                                           |
| AAGTTGGTGATGGC                         | <i>kat ap-1</i> probe                     |
| GCCATCACCAACTTCTTACGCCTGATTCACCTGGTCCA |                                           |
| ATCATGCTTGCG                           | <i>kat ap-1</i> probe                     |

223
